# Supplementary material for: Unusual penta- and hexanuclear Ni(ii)-based silsesquioxane polynuclear complexes
Source: Royal Society of Chemistry journal article supplement (doi:10.1039/c6dt00113k), 2016-01-01
Supplement: c6dt00113k1.pdf [file c6dt00113k1.pdf]

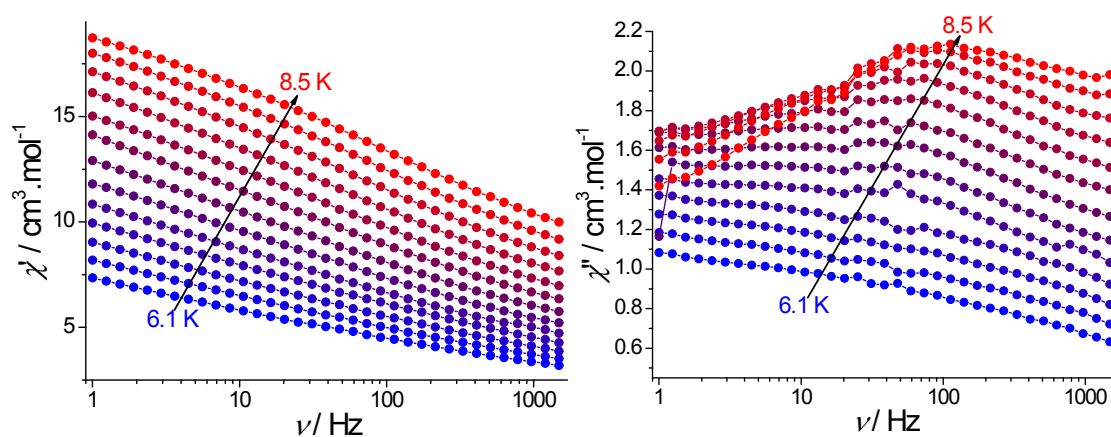

**Figure S1.** Frequency dependence of the in-phase (left) and out-of-phase susceptibilities (right) under a zero-dc field for **1**.

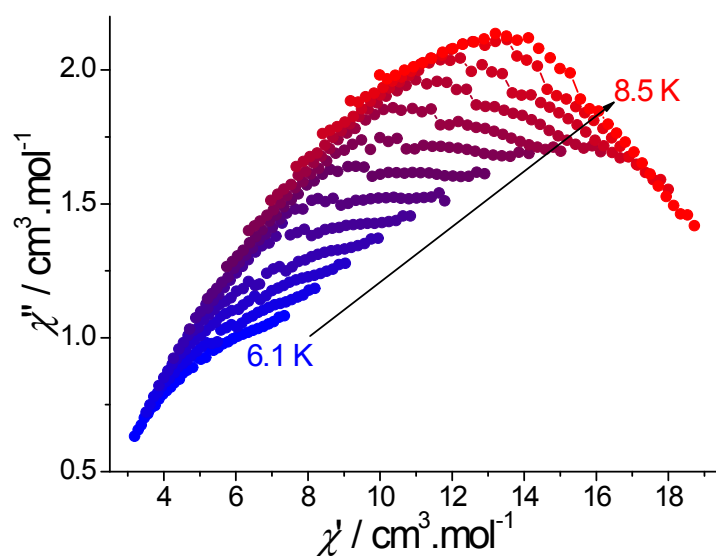

**Figure S2.** Cole-Cole plots for **1**.
